# Supplementary material for: Discovery and Functional Analysis of Secondary Hair Follicle miRNAs during Annual Cashmere Growth
Source: MDPI journal article supplement (doi:10.3390/ijms24021063), 2023-01-05
Supplement: s1 [file s1]

### Supplementary Figure legends

**Figure S1** Identification of miRNAs in SHFs. Proportion of known and novel miRNAs identified in SHFs.

**Figure S2** KEGG pathway enrichment analysis of targeted genes of differentially expressed (DE) miRNAs between different phases in SHFs. The DE miRNAs were divided into four clusters revealed by hierarchical clustering. (A-C) Enriched KEGG pathways are shown for targeted genes of Cluster 1 miRNAs (A), Cluster 3 miRNAs (B) and Cluster 4 miRNAs (C). Rich factor indicates the ratio of target genes enriched in the pathway to genes annotated in the pathway.

**Figure S3** Fluorescence in situ hybridization (FISH) assays of miR-143-3p in PHFs during anagen. The green signals represent the expression of miR-143-3p, the nuclei were stained with DAPI (blue). White arrowheads indicate the bulge region outlined by dashed line. Scale bars, 100  $\mu$ m

### Supplementary Table legends

**Table S1** The mature sequences of predicted novel miRNAs and perfect match results of sequence alignment with five species in the miRbase database, including human (*Homo sapiens*), mouse (*Mus musculus*), cattle (*Bos taurus*), sheep (*Ovis aries*), and chicken (*Gallus gallus*).

**Table S2** Primer sequences for miRNA and mRNA RT-qPCR analysis and *Itga6* vector construction
