# Supplementary material for: Discovery and Functional Analysis of Secondary Hair Follicle miRNAs during Annual Cashmere Growth
Source: MDPI journal article supplement (doi:10.3390/ijms24021063), 2023-01-05
Supplement: s1 [file s1]

**Table S1 Information of novel miRNAs**

| <b>Candidate Name</b> | <b>Mature Sequence</b>   | <b>Perfect match in miRbase</b>                         |
|-----------------------|--------------------------|---------------------------------------------------------|
| chi-miR-203           | gugaaauguuuaggaccacuag   | hsa-miR-203a-3p, mmu-miR-203-3p                         |
| novel_71              | aggcaagaugcuggcagcagcugu |                                                         |
| novel_54              | cugugcgugugacagcggcuga   | hsa-miR-210-3p, mmu-miR-210-3p                          |
| novel_587             | cuaagccagggauugugggu     |                                                         |
| novel_98              | uugaacuguaagaaccacugg    |                                                         |
| novel_704             | auaucugugguuucugcac      |                                                         |
| novel_100             | uguaacagcaacuccauguggaa  |                                                         |
| novel_494             | uuuguucguucggcucgcguga   | hsa-miR-375-3p, mmu-miR-375-3p                          |
| novel_120             | uagcagcgggaaacaguacugcag | mmu-miR-503-5p                                          |
| novel_24              | ugagguaguagguuguauaguu   | hsa-let-7a-5p, mmu-let-7a-5p, bta-let-7a-5p, oar-let-7a |
| novel_130             | uaugugggacgguaaaccgcuu   | mmu-miR-299a-3p                                         |
| novel_697             | gaggguuuggguuuggucguggga |                                                         |
| novel_131             | uauugcacucgucggccucc     | hsa-miR-92b-3p, hsa-miR-92b-3p, bta-miR-92b             |
| novel_148             | auagccaguugggaagaugc     | bta-miR-7857-5p                                         |
| novel_176             | agcugguguugugaauccagccgu |                                                         |
| novel_463             | ugccaagcccacgucaaagg     | bta-miR-6123                                            |
| novel_145             | uagguaguuucauguuguuggg   | hsa-miR-196a-5p, mmu-miR-196a-5p, bta-miR-196a          |
| novel_586             | aggaagucggagcugugcuuu    |                                                         |
| novel_157             | aaaauccgaacgaacuuuuugg   |                                                         |
| novel_182             | uaacagucuacagccauggucg   | hsa-miR-132-3p, mmu-miR-132-3p, bta-miR-132             |
| novel_566             | ucucugucucaauccuguagu    |                                                         |
| novel_234             | agaaaccuggaugaacuuiuugg  | bta-miR-2285r                                           |
| novel_732             | uagaauccacuccugacacca    |                                                         |
| novel_218             | agcugguguugugaauccagggcg | hsa-miR-138-5p, mmu-miR-138-5p, bta-miR-138             |
| novel_206             | aguacuggagcuccaaucaug    |                                                         |
| novel_791             | auuauaggaauugaaccu       |                                                         |
| novel_258             | aggccaaagcaaagcagcuguc   |                                                         |
| novel_498             | agaaaccgaacaaacuuiuuggc  |                                                         |
| novel_421             | cucacacacaccuccuccugcagu |                                                         |
| novel_306             | uaugugggacgguaaaccau     |                                                         |
| novel_244             | gaaaguguaaggcaaggucugg   |                                                         |
| novel_248             | aaaggauucugcugucgguccacu | hsa-miR-541-5p, oar-miR-541-5p                          |
| novel_241             | aacacccggacgaacuuiuugg   |                                                         |
| novel_286             | aagaacccgagcgaacuuiuugg  |                                                         |
| novel_237             | agaguugagucuggacgucccg   | hsa-miR-219a-1-3p, bta-miR-219                          |
| novel_673             | aaucauacaaggacaauuuuuu   | oar-miR-539-3p                                          |
| novel_574             | ucacucagucgugccgaauuacu  |                                                         |
| novel_599             | uaaucucagcuggcaacugug    | gga-miR-216a                                            |

**Table S2 Primer sequences for miRNA and mRNA RT-qPCR and vector construction**

| <b>miRNA Name</b>     | <b>Forward primer sequence (5' to 3')</b> | <b>Reverse primer sequence (5' to 3')</b>       | <b>RT stem-loop primer sequence (5' to 3')</b>          |
|-----------------------|-------------------------------------------|-------------------------------------------------|---------------------------------------------------------|
| chi-miR-143-3p        | CCTGAGATGAAGCACTGT                        | GTCCGAGGTATTCGCACTGG                            | GTCGTATCCAGTGCAGGGTCCGAGGTA<br>TTCGCACTGGATACGACCGAGCT  |
| chi-miR-203           | GGGGTGAAATGTTTAGGAC                       | CAGTGCGTGTCGTGGAGT                              | GTCGTATCCAGTGCAGGGTCCGAGGTA<br>TTCGCACTGGATACGACCGCAATA |
| chi-miR-92a-3p        | TGCCTATCGCACTTGTCC                        | CGCAGGGTCCGAGGTATTC                             | GTCGTATCCAGTGCAGGGTCCGAGGTA<br>TTCGCACTGGATACGACACAGGC  |
| chi-miR-200a          | TAACACTGTCTGGTAACGATGC                    | GCAGGGTCCGAGGTATTCGCACT                         | GTCGTATCCAGTGCAGGGTCCGAGGTA<br>TTCGCACTGGATACGACCATCGT  |
| U6                    | GCTTCGGCAGCACATATACTAAAAT                 | CGCTTCACGAATTTGCGTGTCAT                         | CGCTTCACGAATTTGCGTGTCAT                                 |
| <i>Itga6</i> -WT-UTR  | AGCTTTGTTTAAACGCCCTTAAGAT<br>ATCAGTTGTGC  | GCTCTAGATATCAAATGCAAACAGA<br>CCAG               |                                                         |
| <i>Itga6</i> -MUT-UTR | AAATGCAGGAGGAAGTCAAGTCAC<br>TGGTCTGTTTGC  | GACTTCCTCCTGCATTTTAAACAAC<br>TATAAACACCACTACATT |                                                         |
| <i>Itga6</i>          | TCCATTACATTGCGTTTG                        | TCCACTATGATTGGCTCT                              |                                                         |
| <i>Ki67</i>           | AAGAGGCAGCCCAAGTCAT                       | TTCTTAGCCTACTCCGGCCT                            |                                                         |
