# Supplementary figures and images for: Discovery and Functional Analysis of Secondary Hair Follicle miRNAs during Annual Cashmere Growth
Source: MDPI journal article supplement (doi:10.3390/ijms24021063), 2023-01-05

**Figure S1**

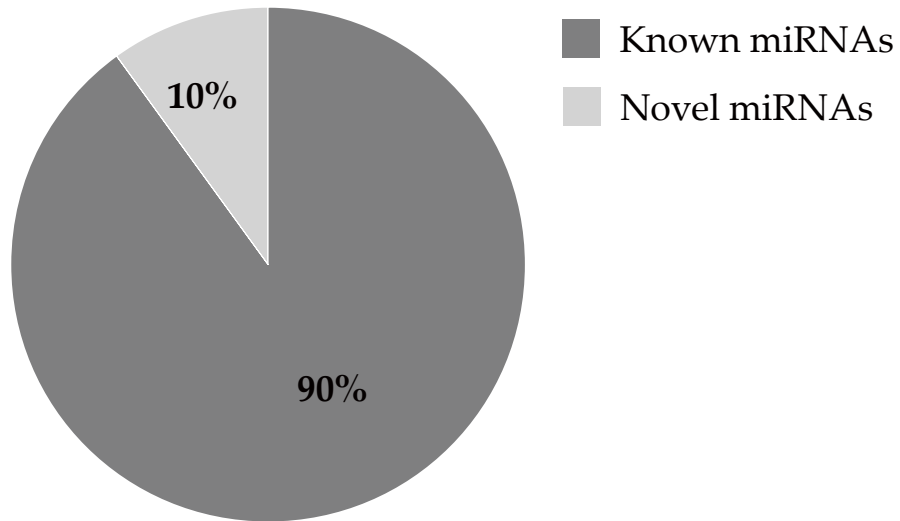

Figure S2

A

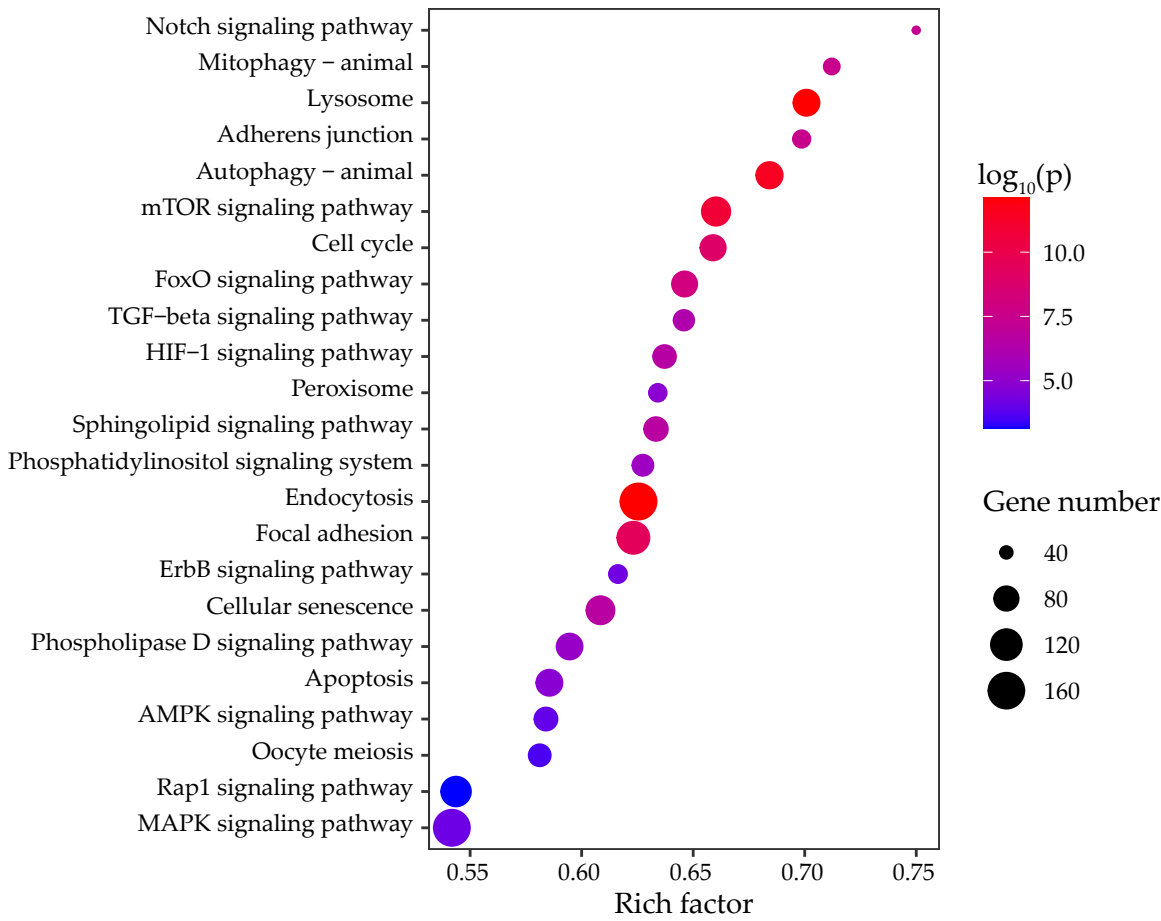

B

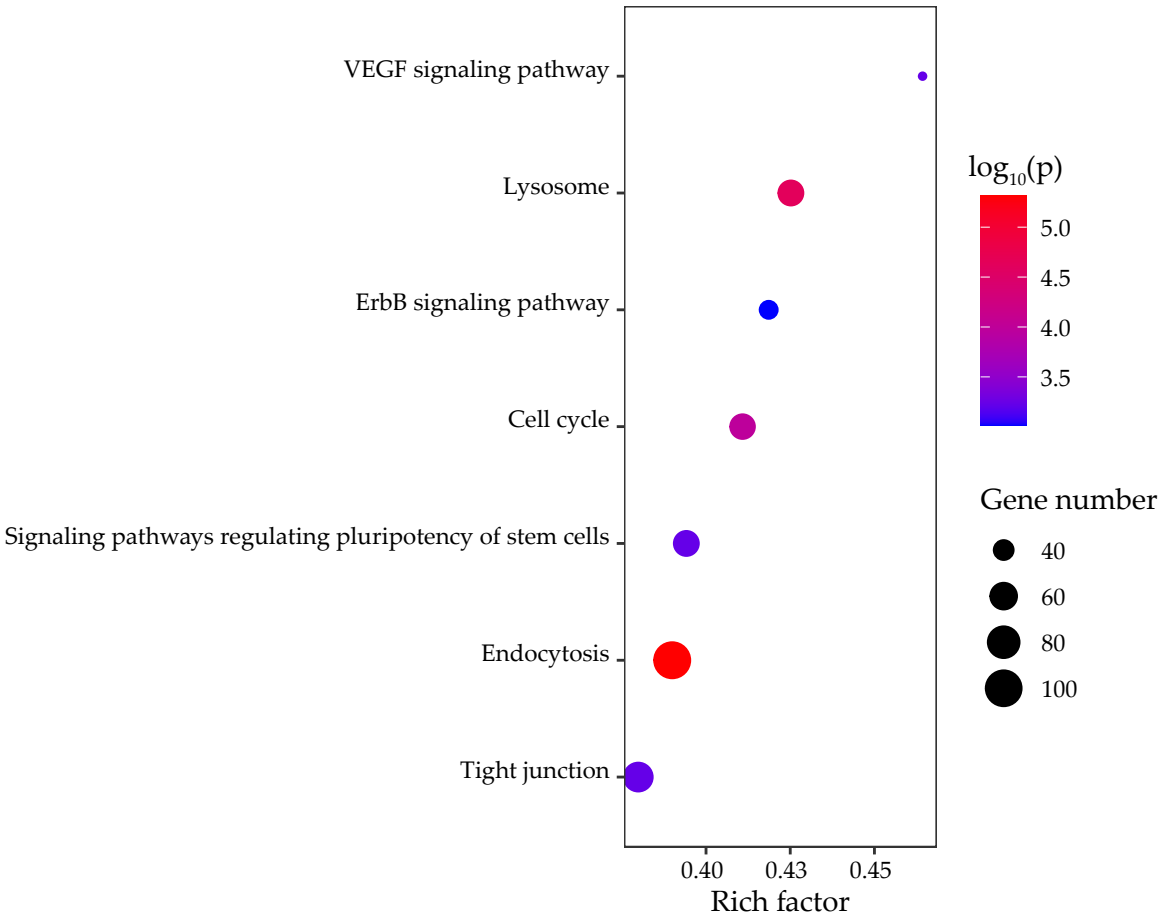

C

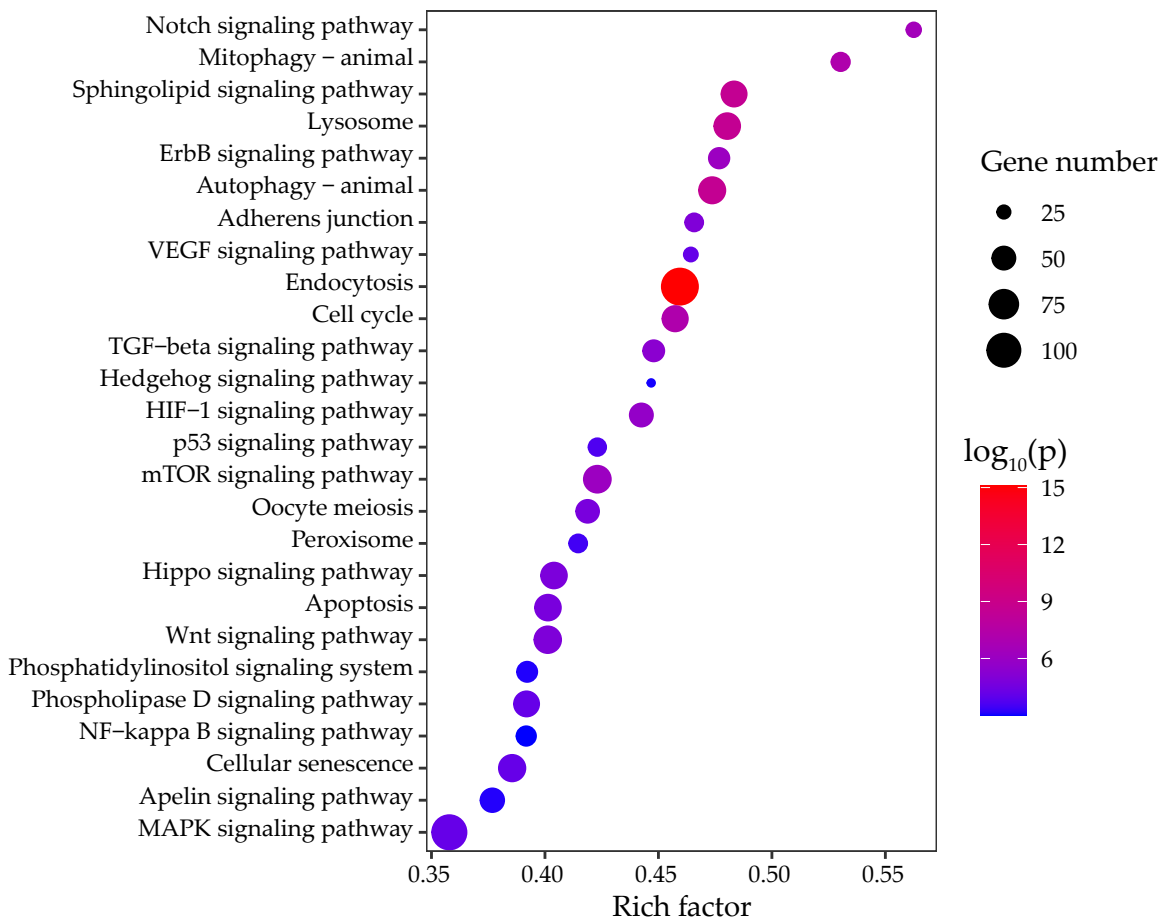

Figure S3

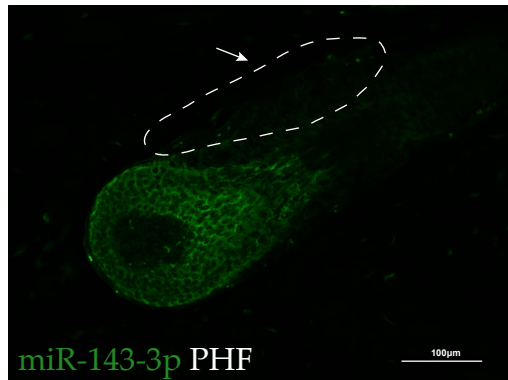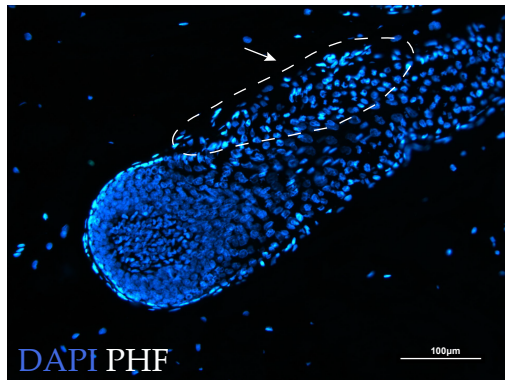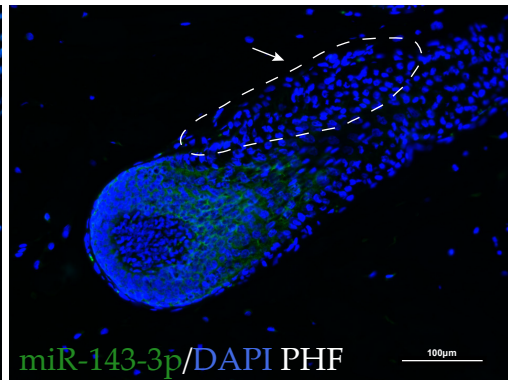

Supplement: s1 [file s1]
